# Supplementary material for: Enhanced energy storage properties in sodium bismuth titanate-based ceramics for dielectric capacitor applications
Source: Royal Society of Chemistry journal article supplement (doi:10.1039/c9tc01239g), 2019-01-01
Supplement: c9tc01239g1.pdf [file c9tc01239g1.pdf]

## Supporting information

### Enhanced energy storage properties in sodium bismuth titanate-based ceramics for dielectric capacitor applications

Yichen Wu,<sup>a,b</sup> Yuzhu Fan,<sup>a,c</sup> Ningtao Liu,<sup>a,c</sup> Ping Peng,<sup>a,c</sup> Mingxing Zhou,<sup>a,c</sup>  
Shiguang Yan,<sup>a</sup> Fei Cao,<sup>a</sup> Xianlin Dong<sup>a,c,d</sup>, and Genshui Wang<sup>a,c,d,\*</sup>

<sup>a</sup> Key Laboratory of Inorganic Functional Materials and Devices, Shanghai Institute of Ceramics,  
Chinese Academy of Sciences, Shanghai 200050, China

<sup>b</sup> Shanghai University, Shanghai 200444, China

<sup>c</sup> University of Chinese Academy of Sciences, Beijing 100049, China

<sup>d</sup> The State Key Lab of High Performance Ceramics and Superfine Microstructure Shanghai  
Institute of Ceramics, Chinese Academy of Sciences, Shanghai 200050, China

#### Corresponding Authors

\*E-mail: genshuiwang@mail.sic.ac.cn

\*E-mail: xldong@mail.sic.ac.cn

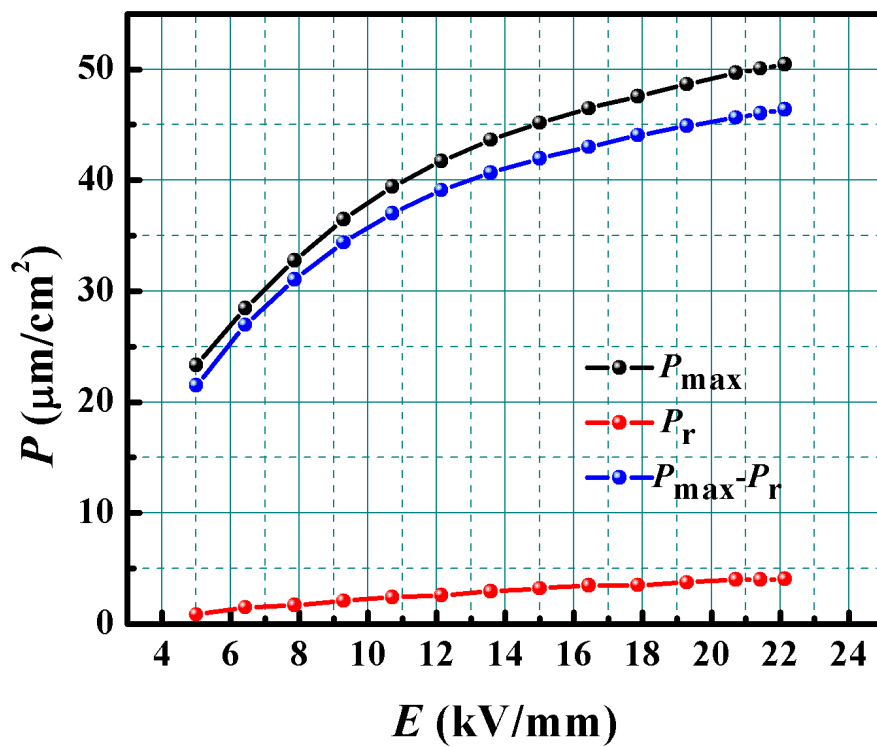

Figure S1.  $P_{\max}$ ,  $P_r$ ,  $\Delta P$  value as a function of electric field.

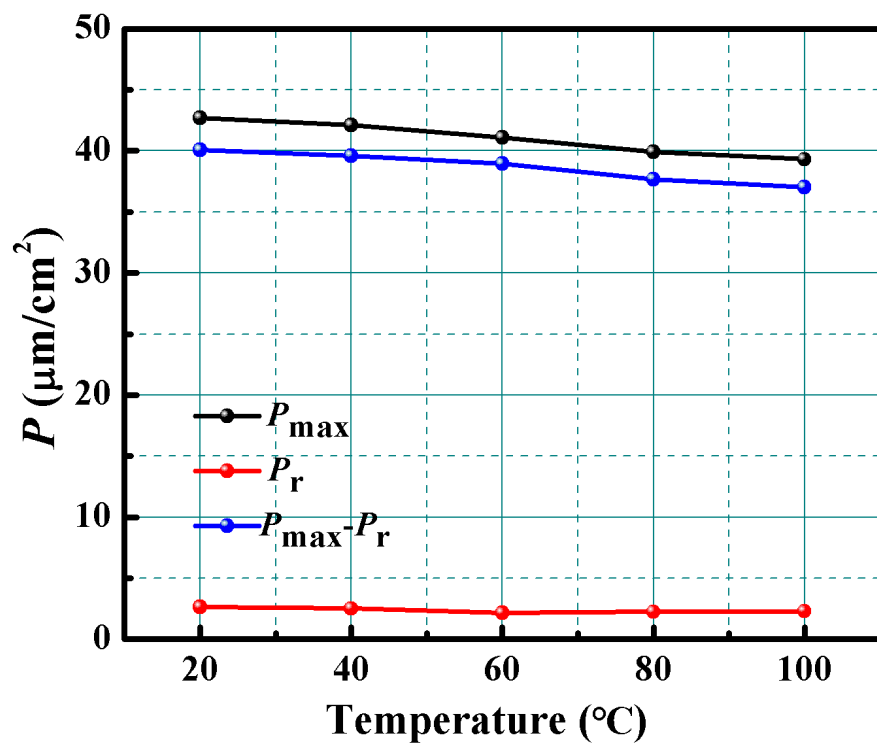

Figure S2.  $P_{\max}$ ,  $P_r$ ,  $\Delta P$  value as a function of temperature.

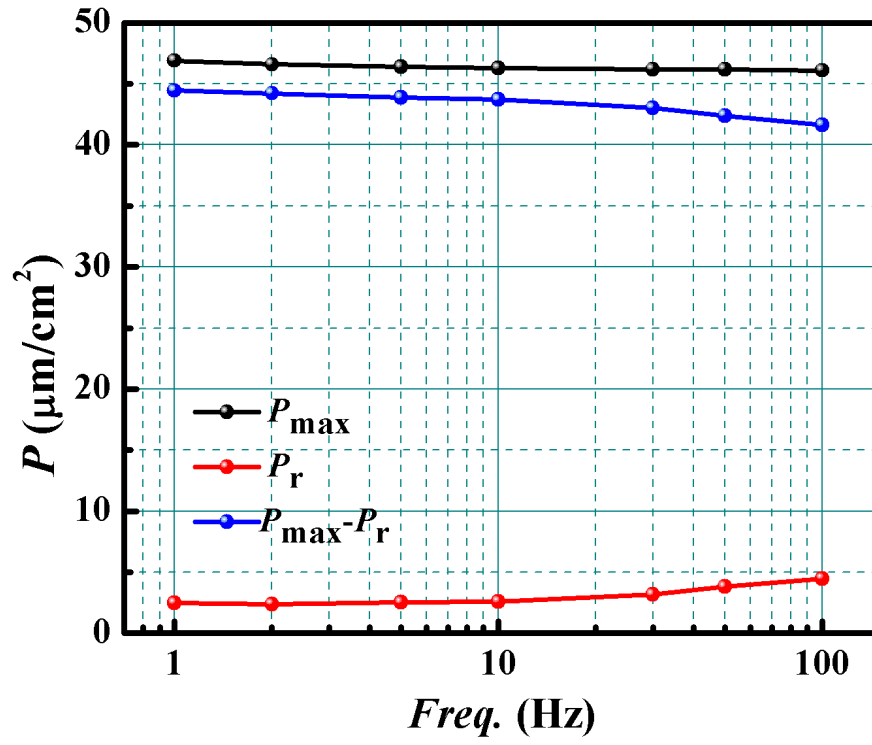

Figure S3.  $P_{\text{max}}$ ,  $P_r$ ,  $\Delta P$  value as a function of frequency.
